# Supplementary material for: Short chain acyl-CoA dehydrogenase deficiency and short-term high-fat diet perturb mitochondrial energy metabolism and transcriptional control of lipid-handling in liver
Source: Nutr Metab (Lond). 2016 Mar 1;13:17. doi: 10.1186/s12986-016-0075-0 (PMC4772307; doi:10.1186/s12986-016-0075-0)
Supplement: Additional file 8: Table S7. — Predicted activation/inhibition of upstream regulators all categories. (XLSX 18 kb) [file 12986_2016_75_MOESM8_ESM.xlsx]

## Sheet: Sheet1
Supplementary Table S7: Predicted activation/inhibition of upstream regulators of all categories. Only factors with an absolute z-score of ≥ 2.0 are shown. Column 1, name of regulator; column 2, up- or down-regulation of regulator (if any); column 3, type of regulator; column 4, activation state of regulator predicted from data; column 5, activation z-score of regulator; column 6, significance of…
Upstream Regulator	Log Ratio	Regulator category	Predicted Activation State	Activation z-score	p-value of overlap	Target molecules in dataset	Comparison
MLX		transcription regulator	Inhibited	-2.789	9.78e-13	ELOVL6,FASN,FGF21,MID1IP1,PKLR,SCD,SLC2A2,THRSP	jhfvsjlf
MLXIPL		transcription regulator	Inhibited	-2.654	1.07e-14	DAK,ELOVL6,FASN,FGF21,G6PC,KHK,MID1IP1,PKLR,SCD,SLC2A2,THRSP	jhfvsjlf
miR-146a-5p (and other miRNAs w/seed GAGAACU)		mature microRNA	Inhibited	-2.236	0.00387	C8A,CD1D,IL1R1,LBP,MCM10	jhfvsjlf
HSF1		transcription regulator	Inhibited	-2.19	0.0519	CELSR1,FASN,HSPA1A/HSPA1B,RPL22,UBC	jhfvsjlf
MYC		transcription regulator	Inhibited	-2.13	2.07e-05	AK2,CDK4,COL15A1,DBI,DUSP1,ENO1,FABP5,FASN,G6PC,GOT1,GPI,HSPA1A/HSPA1B,Ly6a (includes others),MAPK3,MCM5,MT1E,NDRG2,PDK1,PGAM1,PKLR,PRODH,RPL22,SLC2A2,TAT,TKT,UGT1A3	jhfvsjlf
NCOR1		transcription regulator	Activated	2	0.00285	DUSP1,G6PC,IGFBP1,THRSP	jhfvsjlf
CYP1A2	1.362	enzyme	Activated	2	0.00309	CHRNA4,IGFBP2,MT1E,SOCS2	jhfvsjlf
CYP1B1		enzyme	Activated	2	0.0059	CHRNA4,IGFBP2,MT1E,SOCS2	jhfvsjlf
CYP1A1		enzyme	Activated	2	0.0431	CHRNA4,IGFBP2,MT1E,SOCS2	jhfvsjlf
estrogen receptor		group	Activated	2	0.165	CAPG,GSTA5,HSPA1A/HSPA1B,PCDH1,POR	jhfvsjlf
AMPK		complex		2	3.72e-05	AACS,FASN,G6PC,NR0B2,PKLR,SREBF1,THRSP	jhfvsjlf
APP		other	Activated	2.135	6.56e-07	ALDOC,ARF4,ARNTL,CALR,CD74,CDK4,DBI,ENO1,GNA12,GPI,Gsta4,HERPUD1,IGFBP2,LBP,Ly6a (includes others),MCM10,MT1E,MTHFD1L,PDK1,PGAM1,SLC1A2,SOCS3,ST3GAL5,TUBB2A,TUBB3,UBC,VKORC1L1	jhfvsjlf
CNTF		cytokine	Activated	2.16	7.49e-05	FASN,LBP,SCD,SERPINA3,SOCS2,SOCS3,SREBF1	jhfvsjlf
INSIG2		other	Activated	2.406	2.21e-08	ELOVL6,FASN,GPAM,INSIG1,SCD,SREBF1	jhfvsjlf
NR1I3	1.266	ligand-dependent nuclear receptor	Activated	2.409	1.3e-15	ABCC3,ALAS1,APOA1,CYP1A2,CYP27A1,CYP2A13/CYP2A6,CYP2F1,Gsta4,GSTA5,GSTM1,IL1R1,INSIG1,LEAP2,MT1E,POR,SREBF1,SULT1A3/SULT1A4,UGT1A3	jhfvsjlf
TNF		cytokine	Activated	2.72	8.31e-12	AATK,ABCC3,AK2,ALDH2,ANPEP,APOA1,AQP9,ARF4,CALR,CASP6,CDK4,CEBPB,COL15A1,CYP27A1,DBI,DUSP1,FABP5,FASN,FST,GPAM,GPD2,Gsta4,HSPA1A/HSPA1B,IGFBP1,IGFBP2,IL1R1,IL1RL1,INSIG1,LBP,MEOX1,MT1E,NR0B2,NR1I3,NUAK2,PIGR,PLXNB2,PPP1R3C,PRTN3,PSMB10,RARRES2,RBPMS,RNASE4,RXRA,SCD,SERPINA3,SLC1A2,SLC27A5,SLC2A2,SOCS3,SQLE,SREBF1,ST3GAL5,THRSP	jhfvsjlf
GH1		growth factor	Activated	2.758	3.07e-06	ACAA1,CEBPB,Cyp2a12/Cyp2a22,Cyp4a14,DBI,FASN,G6PC,IGFBP1,NDRG2,SOCS2,SOCS3,SREBF1,TKT	jhfvsjlf
NFE2L2		transcription regulator	Activated	2.918	4.05e-18	ABCC3,ACSL5,ALAS1,BNIP3,Calm1 (includes others),CD8B,CLPP,Cml1,Cyp2a12/Cyp2a22,Cyp4a14,DYNLL1,EPB41,GNA14,Gsta4,GSTA5,GSTM1,GSTT2/GSTT2B,HERPUD1,INMT,MAFG,MORF4L2,MSMO1,MT1E,NR0B2,NR1I3,PSMA7,SERPINA3,SLC3A1,SOCS3,SREBF1,THRSP,UBC,UOX	jhfvsjlf
LEP		growth factor	Activated	3.671	3.26e-12	ABCC3,ACSL5,APOA1,AQP9,CEBPB,Cyp2a12/Cyp2a22,CYP2C18,CYP2F1,CYP4A11,Cyp4a14,EHHADH,ELOVL5,ELOVL6,FASN,G6PC,GPAM,IGFBP2,IL1R1,MSMO1,SCD,SLC27A5,SLC2A2,SOCS3,SREBF1,THRSP,UGP2	jhfvsjlf
HOXA10		transcription regulator	Inhibited	-2.449	0.000598	APOE,EGFR,HLA-DQB1,ID1,KLF10,LCN2,TDO2	jhfvskzhf
STAT6		transcription regulator	Inhibited	-2.433	0.00128	ALDH2,APOE,Ccl6,Ly6a (includes others),NFIL3,PLSCR1,S100A10	jhfvskzhf
Hdac		group	Inhibited	-2.361	0.000535	EGFR,FOS,JUN,KLF10,MT1E,MYC	jhfvskzhf
TRIM24		transcription regulator	Inhibited	-2.236	0.00116	BLNK,BST2,Ly6a (includes others),PSMB8,PSMB9	jhfvskzhf
GATA1		transcription regulator	Inhibited	-2.213	0.00119	Hbb,HBD,MYC,NFIL3,PIM1,ZFPM1	jhfvskzhf
CD3		complex	Inhibited	-2.105	0.0046	ALAS1,BST2,CD74,FOS,HLA-DQB1,HSPA5,JUN,Ly6a (includes others),MYC,PSAP,SLPI,SOCS3	jhfvskzhf
SOX2		transcription regulator	Inhibited	-2	0.00286	CTGF,EGFR,FOS,JUN	jhfvskzhf
SFTPA1		transporter	Inhibited	-2	0.00286	CTGF,FOS,MYC,PHLDA1	jhfvskzhf
EIF2AK2		kinase	Activated	2	4.53e-05	CEBPB,FOS,MYC,NNMT,PLSCR1,SOCS3	jhfvskzhf
IL29		other	Activated	2	0.00259	BST2,HLA-C,PLSCR1,PSMB9	jhfvskzhf
PPARA		ligand-dependent nuclear receptor	Activated	2.001	1.12e-15	Acot1,ALDH2,APOA1,AQP8,CEBPB,CYP2C8,Cyp4a14,DECR2,DIO1,EHHADH,ELOVL3,FOS,GSTT2/GSTT2B,HMOX1,INSIG1,LECT2,MVD,MYC,Orm1 (includes others),PHLDA1,PRC1,RNF186,SAA1,SERINC2,TMEM98	jhfvskzhf
PDGF BB		complex	Activated	2.008	2.3e-08	CEBPB,CTGF,EGFR,FOS,GADD45A,HMOX1,JUN,KLF10,MT1E,MYC,NFIL3,PHLDA1,PIM1,SERPINA3,SOCS3	jhfvskzhf
VEGFA		growth factor	Activated	2.008	0.00173	ALAS1,ALDH2,CTGF,FOS,HMOX1,ID1,PIM1	jhfvskzhf
P38 MAPK		group	Activated	2.01	0.000468	BNIP3,CTGF,DDC,FOS,HMOX1,HSPA5,JUN,MYC,SOCS3	jhfvskzhf
CD40LG		cytokine	Activated	2.019	5.62e-05	BNIP3,CTGF,EGFR,FOS,GADD45A,HLA-DQB1,JUN,MT1E,MYC,PIM1,PSMB8,PSMB9	jhfvskzhf
STAT1		transcription regulator	Activated	2.039	9.1e-09	APOE,AXL,CYP2C8,CYP3A5,FOS,HLA-DRB1,JUN,MYC,PIM1,PSMB8,PSMB9,S100A10,SERPINA3,SOCS3	jhfvskzhf
IL17A		cytokine	Activated	2.05	0.000175	CEBPB,CTGF,FOS,JUN,LCN2,SAA2,SOCS3	jhfvskzhf
STAT5A		transcription regulator	Activated	2.058	7.38e-05	CEBPB,FOS,GADD45A,ID1,MYC,PIM1,SOCS3	jhfvskzhf
Pkc(s)		group	Activated	2.064	6.63e-06	APOA1,CTGF,EGFR,FOS,HMOX1,HSPA5,JUN,MAPK3,PHLDA1	jhfvskzhf
SMAD3		transcription regulator	Activated	2.073	1.47e-05	APOA1,CTGF,FOS,HMOX1,ID1,JUN,MYC,Orm1 (includes others),VIM	jhfvskzhf
EDN1		cytokine	Activated	2.091	1.39e-06	CTGF,EGFR,ERRFI1,FOS,GRN,HSPA5,JUN,MYC,SOCS3,VIM	jhfvskzhf
NR1I3		ligand-dependent nuclear receptor	Activated	2.116	3.01e-11	ALAS1,APOA1,CYP2C8,CYP3A5,DIO1,EIF4EBP1,GSTA5,INSIG1,MT1E,MYC,SULT1A3/SULT1A4,UGT2B15	jhfvskzhf
AKT1		kinase	Activated	2.162	0.00118	CD74,FOS,HMOX1,LCN2,MYC,PHLDA1,VIM	jhfvskzhf
IL15		cytokine	Activated	2.178	8.89e-05	CD74,CTGF,JUN,MAPK3,MYC,PDCD4,PIM1,PSAP,PSMB8,PSMB9,TYROBP	jhfvskzhf
JAK2		kinase	Activated	2.189	9.67e-05	FOS,MYC,PSMB9,SAA2,SOCS3	jhfvskzhf
CDKN2A		transcription regulator	Activated	2.2	0.00532	CEBPB,CTGF,Hbb,HUNK,JUN,VIM	jhfvskzhf
MAPK14		kinase	Activated	2.219	0.00136	EGFR,FOS,GADD45A,HMOX1,JUN,SOCS3	jhfvskzhf
TLR9		transmembrane receptor	Activated	2.219	0.0082	HMOX1,LCN2,PHLDA1,SAA2,SOCS3	jhfvskzhf
IKBKB		kinase	Activated	2.322	5.49e-07	CEBPB,FOS,GADD45A,GRN,HLA-B,HLA-C,HMOX1,LCN2,MT1E,MYC,SAA2,SOCS3	jhfvskzhf
Pdgf (complex)		complex	Activated	2.343	8.71e-05	EGFR,ERRFI1,FOS,HMOX1,JUN,MYC	jhfvskzhf
CHUK		kinase	Activated	2.347	7.83e-10	CEBPB,FOS,GRN,HES6,HLA-B,HLA-C,HMOX1,KLF10,LCN2,MT1E,MYC,PLSCR1,SAA2,SOCS3	jhfvskzhf
GH1		growth factor	Activated	2.379	8.91e-10	APOE,CEBPB,Cyp2a12/Cyp2a22,CYP2C8,Cyp4a14,FOS,GADD45A,Hsd3b4 (includes others),ID1,JUN,MYC,SOCS3,TSC22D1,VIM	jhfvskzhf
IL1A		cytokine	Activated	2.511	6.83e-06	CYP3A5,FOS,HMOX1,JUN,LCN2,MYC,P2RY6,SAA1,SAA2,SERPINA3	jhfvskzhf
NFkB (complex)		complex	Activated	2.536	2.74e-09	APOE,CD74,CEBPB,CTGF,CYP3A5,EGFR,FOS,GADD45A,HLA-C,HMOX1,JUN,LCN2,MYC,PSMB9,SAA1,SAA2,SCFD1,SERPINA3,SLPI,SOCS3,VIM	jhfvskzhf
ERK		group	Activated	2.563	0.00108	CTGF,FOS,HMOX1,JUN,KLF10,LCN2,MYC	jhfvskzhf
TLR3		transmembrane receptor	Activated	2.646	8.61e-05	CSRP3,FOS,HMOX1,ID1,LCN2,PHLDA1,SAA2,SLPI,SOCS3	jhfvskzhf
IL1B		cytokine	Activated	2.649	1.91e-13	APOE,CD74,CEBPB,CYP3A5,DIO1,ERRFI1,FOS,GADD45A,GRN,HEXA,HLA-B,HLA-C,HMOX1,JUN,KLF10,LCN2,MT1E,MYC,NFIL3,PHLDA1,PIM1,PLSCR1,PSMB8,PSMB9,S100A10,SAA1,SAA2,SERPINA3,SOCS3,VIM	jhfvskzhf
IL6		cytokine	Activated	2.691	1.57e-15	ALAS1,APOA1,APOE,BST2,CD74,CEBPB,CTGF,CYP2C8,CYP3A5,DIO1,EGFR,FOS,GADD45A,HLA-C,HLA-DRB1,HMOX1,HSPA5,ID1,JUN,MT1E,MYC,Orm1 (includes others),PIM1,PSMB8,PSMB9,SAA1,SAA2,SERPINA3,SOCS3,VIM	jhfvskzhf
Ras		group	Activated	2.706	3.13e-06	BNIP3,CTGF,FOS,HMOX1,JUN,MAPK3,MYC,PDCD4	jhfvskzhf
RELA		transcription regulator	Activated	2.733	4.89e-05	APOE,CEBPB,FOS,HLA-B,HMOX1,JUN,KLF10,MYC,PSMB9,SAA1,SAA2	jhfvskzhf
IFNG		cytokine	Activated	2.795	5.33e-14	Acot1,BLNK,BST2,Ccl6,CD276,CD74,CEBPB,CTGF,DIO1,FOS,GNA14,HBD,HLA-B,HLA-C,HLA-DQB1,HLA-DRB1,HMOX1,ID1,IL18BP,JUN,KLF10,LCN2,Ly6a (includes others),MT1E,MYC,NTRK2,P2RY6,PHLDA1,PIM1,PRSS8,PSMB8,PSMB9,S100A10,SAA2,SLC40A1,SLPI,SOCS3,TYROBP	jhfvskzhf
Cg		complex	Activated	2.808	0.0029	CEBPB,HLA-C,Hsd3b4 (includes others),JUN,MAPK3,PHLDA1,S100A10,SAA2	jhfvskzhf
STAT3		transcription regulator	Activated	2.823	1.38e-09	CD74,CEBPB,FOS,GADD45A,HLA-C,HLA-DRB1,HMOX1,MT1E,MYC,PHLDA1,PIM1,PLSCR1,PSMB8,PSMB9,SAA1,SERPINA3,SOCS3,VIM	jhfvskzhf
TNF		cytokine	Activated	2.84	2.1e-12	ALDH2,APOA1,APOE,BST2,Ccl6,CEBPB,CTGF,CYP2C8,DIO1,EGFR,FOS,GADD45A,GRN,HEXA,HLA-B,HLA-C,HMOX1,ID1,IL18BP,INSIG1,JUN,KLF10,LCN2,MT1E,MYC,NNMT,P2RY6,PHLDA1,PLSCR1,PSMB8,PSMB9,RBPMS,RGS5,SAA1,SAA2,SERPINA3,SLPI,SOCS3,ST3GAL5,VIM	jhfvskzhf
HRAS		enzyme	Activated	2.909	1.92e-06	BNIP3,CEBPB,CTGF,EGFR,EIF4EBP1,FOS,GNA14,GRN,HLA-B,HLA-C,HMOX1,JUN,MAPK3,MYC,PSMB9,TSC22D1,VIM	jhfvskzhf
NFKBIA		transcription regulator	Activated	2.94	1.05e-09	APOA1,AXL,BNIP3,CEBPB,FOS,GADD45A,GRN,HLA-B,HLA-C,HMOX1,HSPA5,JUN,LCN2,MT1E,MYC,PIM1,SAA2,SCFD1,SOCS3	jhfvskzhf
IKBKG		kinase	Activated	2.957	7.45e-07	CEBPB,FOS,GRN,HLA-B,HLA-C,LCN2,MT1E,SAA2,SOCS3	jhfvskzhf
LEP		growth factor	Activated	3.088	2.47e-07	APOA1,CEBPB,Cyp2a12/Cyp2a22,CYP2C8,CYP3A5,Cyp4a14,EHHADH,FOS,HSPA5,JUN,MYC,SAA2,SOCS3,TMED9,VIM	jhfvskzhf
EGF		growth factor	Activated	3.494	2.09e-09	APOA1,CEBPB,CTGF,EGFR,ERRFI1,FOS,GADD45A,HMOX1,ID1,JUN,KLF10,MAPK3,MYC,PDCD4,PLSCR1,S100A10,SERPINA3,SOCS3,VIM	jhfvskzhf
IL6		cytokine	Inhibited	-2.103	2.05e-07	CP,CYP1A2,CYP2C8,CYP3A5,DIO1,FGL1,FOS,G6PC,IL6R,PRTN3,SERPINE1,THRSP	jlfvskzlf
PPARA		ligand-dependent nuclear receptor	Activated	2.157	1.02e-10	ACAA1,AGXT,CYP2C8,DIO1,ELOVL6,FABP5,FASN,FGF21,FOS,G6PC,GPAM,Mup1 (includes others),SQLE	jlfvskzlf
MYC		transcription regulator	Activated	2.18	0.000491	FABP5,FASN,FOS,G6PC,GOT1,GPI,MAPK3,NDRG1,SERPINE1	jlfvskzlf
MLX		transcription regulator	Activated	2.236	2.3e-10	DIO1,ELOVL6,FASN,FGF21,THRSP	jlfvskzlf
IL6		cytokine	Inhibited	-3.2	6.03e-08	ABCC2,ANXA1,APCS,BST2,CD79A,CP,CTGF,CYP1A2,DUSP1,EGFR,ENPP2,EOMES,FGL1,FOS,G6PC,GALE,HLA-C,IGFBP1,JUN,NR1H4,Orm1 (includes others),PIM1,SAA1,SERPINA7,THRSP	kzhfvskzlf
MLXIPL		transcription regulator	Inhibited	-2.654	2.38e-15	ACACB,DAK,ELOVL6,FASN,G6PC,Ins1,KHK,MID1IP1,PKLR,SCD,THRSP	kzhfvskzlf
EGF		growth factor	Inhibited	-2.64	0.000174	CTGF,DDX5,DUSP1,EGFR,FASN,FOS,FST,IGFBP1,IGFBP2,Ins1,JUN,KLF10,S100A10,SCD,SREBF1	kzhfvskzlf
RELA		transcription regulator	Inhibited	-2.599	0.031	DUSP1,FOS,JUN,KLF10,NR1I3,SAA1,SREBF1,STIM1	kzhfvskzlf
IL1A		cytokine	Inhibited	-2.591	0.0107	ABCC2,CYP1A2,FOS,FTH1,JUN,PDZK1IP1,SAA1	kzhfvskzlf
SREBF1	-0.774	transcription regulator	Inhibited	-2.559	1.39e-12	AACS,ACACB,ACSL5,AGMAT,APOC3,CYP8B1,ELOVL6,FABP5,FASN,FDFT1,G6PC,GPAM,Ins1,MSMO1,PKLR,SCD,SREBF1,THRSP	kzhfvskzlf
MLX		transcription regulator	Inhibited	-2.415	3.44e-09	ELOVL6,FASN,MID1IP1,PKLR,SCD,THRSP	kzhfvskzlf
ERK		group	Inhibited	-2.377	0.000105	ACSL5,CLDN4,CTGF,DUSP1,FOS,FST,IGFBP1,JUN,KLF10,RECK	kzhfvskzlf
Cg		complex	Inhibited	-2.375	0.00267	DUSP1,FABP5,FST,HLA-C,IGFBP2,JUN,KHK,MCM10,S100A10,SREBF1	kzhfvskzlf
SCD	-3.668	enzyme	Inhibited	-2.364	2.81e-05	ACACB,FASN,G6PC,GPAM,Ins1,SREBF1	kzhfvskzlf
OSM		cytokine	Inhibited	-2.318	0.000855	ACAA1,AMACR,ANXA1,CDA,CLDN4,FOS,HLA-C,JUN,KLF10,LY6D,LY6G6C,PDZK1IP1,RNASE4,SAA1,SLPI	kzhfvskzlf
SYVN1		transporter	Inhibited	-2.236	0.0188	CDA,DUSP1,FASN,HLA-C,RPN2	kzhfvskzlf
PRKCB		kinase	Inhibited	-2.213	0.000292	CYP8B1,FASN,FOS,JUN,SREBF1	kzhfvskzlf
PDGF BB		complex	Inhibited	-2.191	0.00023	CP,CTGF,DUSP1,EGFR,FASN,FOS,JUN,KLF10,PIM1,RPN2,SCD,SREBF1	kzhfvskzlf
TNFSF10		cytokine	Inhibited	-2.142	0.00024	CASP9,EGFR,FOS,FTH1,HLA-C,JUN	kzhfvskzlf
Tgf beta		group	Inhibited	-2.135	0.0381	CD79A,CTGF,FOS,FST,JUN,KLF10	kzhfvskzlf
TGFB1		growth factor	Inhibited	-2.115	0.00038	ABCC2,AQP11,AQP8,CASP9,CLDN4,COL4A6,CTGF,DDX5,DNAJA1,DUSP1,EOMES,FABP5,FOS,FTH1,GALM,IGFBP2,JUN,KLF10,MSMO1,MYL6,NET1,NPTXR,PDZK1IP1,PHF15,PIM1,PRSS3,RPN2,S100A10,SCD,SELENBP1,SOD3,TSC22D1,TUBB2A	kzhfvskzlf
Ras		group	Inhibited	-2.1	0.0095	CLDN4,CTGF,FOS,JUN,SREBF1	kzhfvskzlf
Ins1	-1.076	other	Inhibited	-2.087	1.38e-07	APOC3,ATP1A2,ELOVL6,FASN,FDFT1,FOS,G6PC,IGFBP1,IGFBP2,Ins1,JUN,PKLR,PTGFRN,RGN,SCD,SREBF1,THRSP	kzhfvskzlf
IL1		group	Inhibited	-2.081	3.9e-05	APOC3,CP,CYP1A2,DDC,DUSP1,EGFR,FOS,FTH1,IGFBP1,JUN,NR1H4,SAA1,SREBF1	kzhfvskzlf
NCOR-LXR-Oxysterol-RXR-9 cis RA		complex	Inhibited	-2	0.000177	FASN,FDFT1,SCD,SREBF1	kzhfvskzlf
NFYA		transcription regulator	Inhibited	-2	0.000223	FASN,FTH1,GPAM,JUN,SCD,THRSP	kzhfvskzlf
PRMT5		enzyme	Activated	2	2.77e-05	CYP8B1,FASN,G6PC,SREBF1	kzhfvskzlf
N-cor		group	Activated	2	0.00112	CXCL14,FASN,SCD,SREBF1	kzhfvskzlf
NCOR1		transcription regulator	Activated	2	0.00174	DUSP1,G6PC,IGFBP1,THRSP	kzhfvskzlf
NKX2-3		transcription regulator	Activated	2	0.217	ADAMTSL2,HLA-C,PARP9,PIM3	kzhfvskzlf
CD3		complex	Activated	2.038	0.301	ANXA1,BST2,EOMES,FOS,JUN,NHLH2,PKLR,SLPI,STIM1	kzhfvskzlf
miR-30c-5p (and other miRNAs w/seed GUAAACA)		mature microRNA	Activated	2.219	0.00116	CDCP1,CTGF,Ins1,JUN,PTGFRN,STX7	kzhfvskzlf
SOX2		transcription regulator	Activated	2.236	0.000207	CTGF,EGFR,FOS,FST,HOXC4,JUN	kzhfvskzlf
INSIG1		other	Activated	2.3	2.92e-06	AACS,ACACB,ELOVL6,FABP5,FASN,FDFT1,GPAM,SCD,SREBF1	kzhfvskzlf
AMPK		complex	Activated	2.416	1.56e-05	AACS,FASN,G6PC,PKLR,SREBF1,STIM1,THRSP	kzhfvskzlf
ELOVL5	-1.019	enzyme	Activated	2.425	5.14e-08	ELOVL6,FASN,G6PC,GPAM,INSIG2,SCD	kzhfvskzlf
SLC13A1		transporter	Activated	2.53	1.15e-07	ACSL5,ACTG1,AQP8,ARRDC2,C6,ELOVL6,GALE,GPAM,IGFBP2,SCD	kzhfvskzlf
