# Supplementary material for: Short chain acyl-CoA dehydrogenase deficiency and short-term high-fat diet perturb mitochondrial energy metabolism and transcriptional control of lipid-handling in liver
Source: Springer Nature journal article supplement (doi:10.1186/s12986-016-0075-0), 2016-03-01
Supplement: MOESM4 [file 25660426]

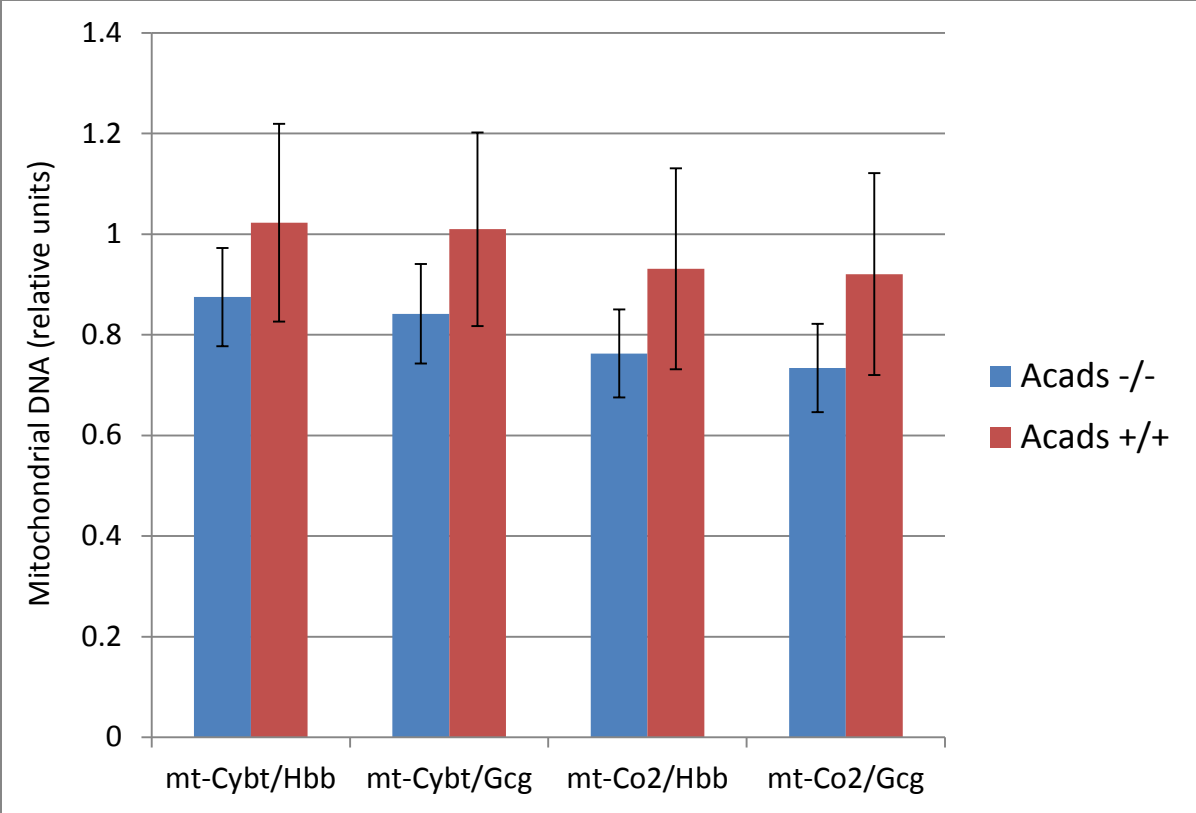

Supplementary Figure
