# Supplementary material for: Short chain acyl-CoA dehydrogenase deficiency and short-term high-fat diet perturb mitochondrial energy metabolism and transcriptional control of lipid-handling in liver
Source: Springer Nature journal article supplement (doi:10.1186/s12986-016-0075-0), 2016-03-01

**Figure S2:** Average-linkage clustering of *all categories* of candidate upstream regulators identified as significantly activated or inhibited in at least one of the four comparisons ( $|z| \geq 2$ ). Clustering results are presented as a heatmap and color coded according to the magnitude of the z-score. Positive z-scores are colored in shades of red and negative z-scores in green.

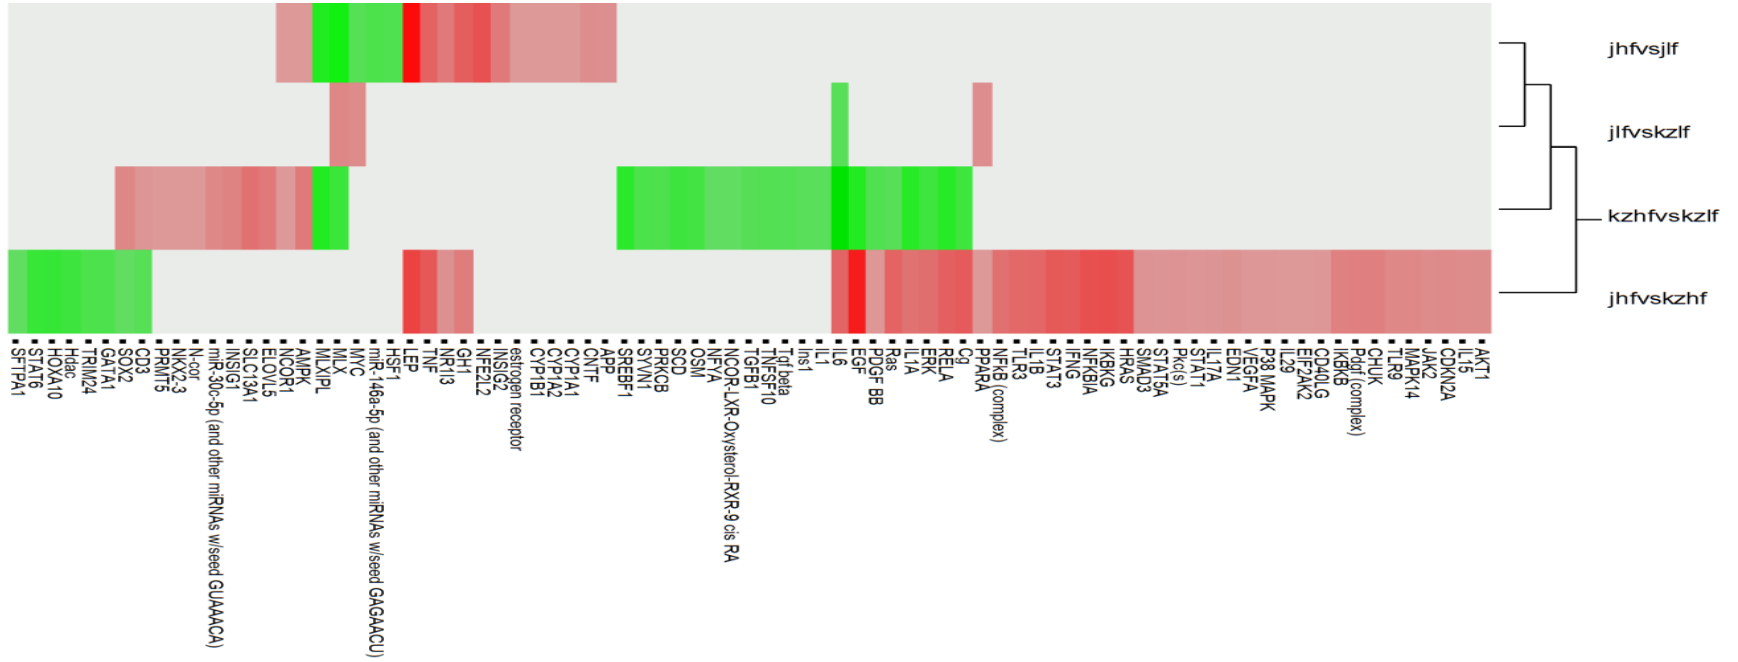

Supplement: MOESM9 [file 25660426]
